# Supplementary material
Source: Springer Nature journal article supplement (https://www.springermedizin.de/resource/supplementary/12887_2010_402_MOESM7_ESM.pdf/9475038)

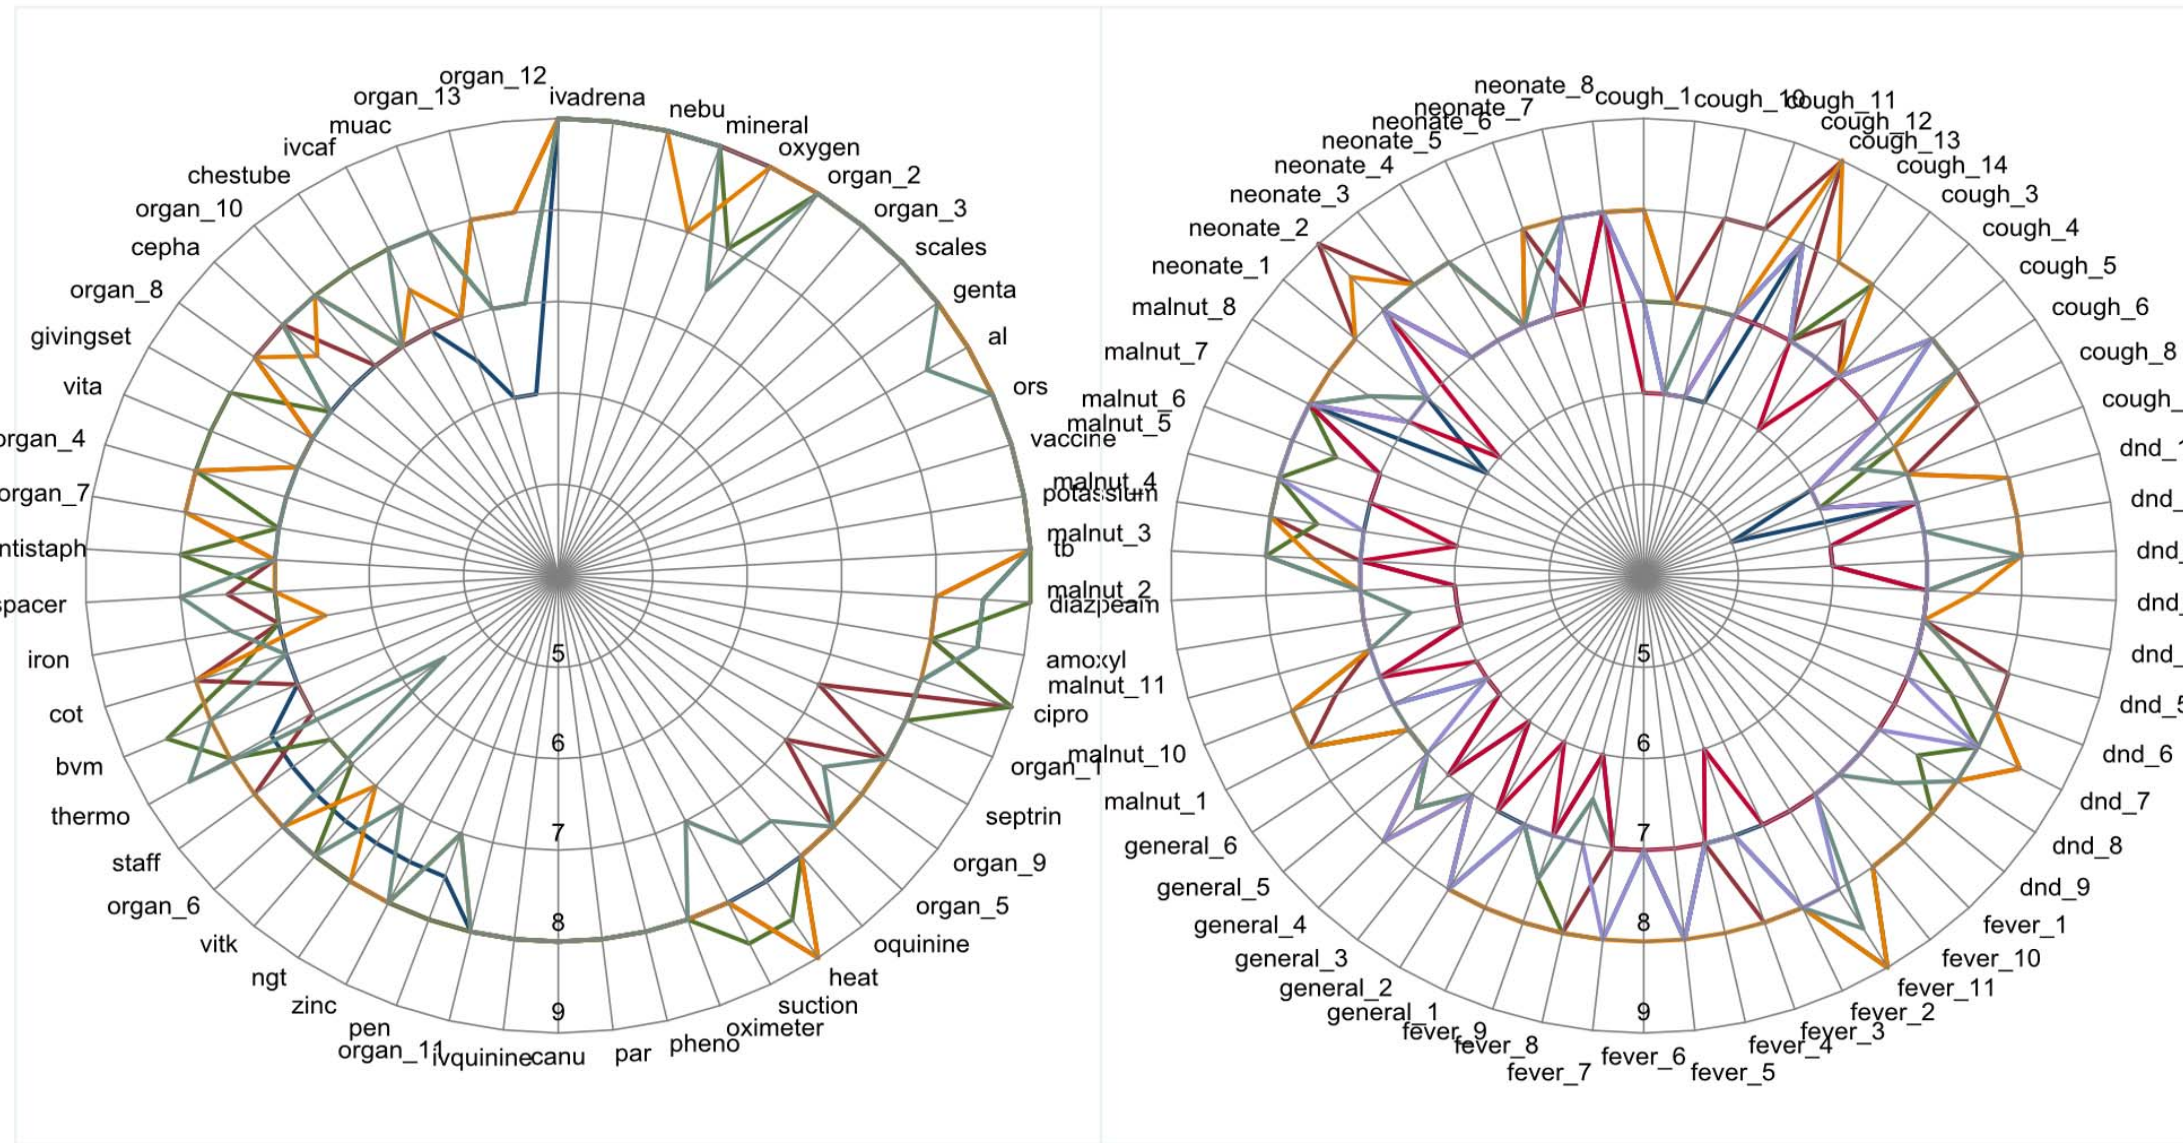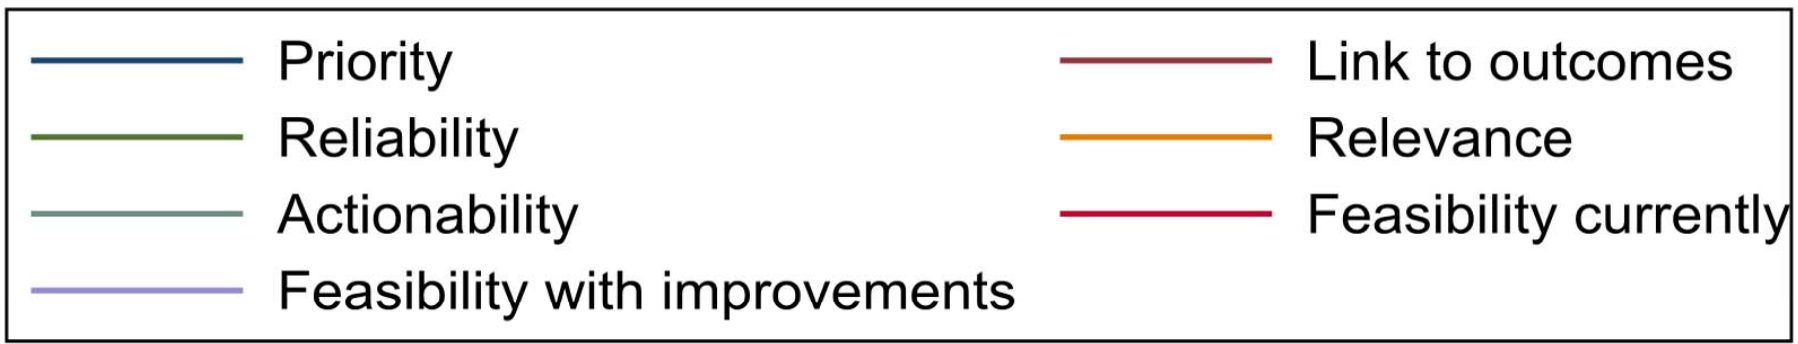

Supplement: MOESM7 [file 9475038]
